# Supplementary material for: A unified computational framework for single-cell data integration with optimal transport
Source: PubMed Central journal article supplement (PMC9715710; doi:10.1038/s41467-022-35094-8), 2022-12-01
Supplement: 41467_2022_35094_MOESM3_ESM.pdf [file 41467_2022_35094_MOESM3_ESM.pdf]

### **Description of additional supplementary Files**

Supplementary Data 1 : links to all data sources.
